# Supplementary material for: Phosphorus acid: an asset for flame-retardant sustainable vitrimers
Source: Royal Society of Chemistry journal article supplement (doi:10.1039/d3py01328f), 2024-01-01
Supplement: d3py01328f1.pdf [file d3py01328f1.pdf]

## Supporting Informations to Phosphorus acid: an asset for flame-retardant sustainable vitrimers

Florian Cuminet<sup>ab</sup>, Nathan Vanachte<sup>a</sup>, Chloé Farina<sup>a</sup>, Maxinne Denis<sup>a</sup>, Claire Negrell<sup>a</sup>, Sylvain Caillol<sup>a</sup>, Éric Dantras<sup>b</sup>, Éric Leclerc<sup>a</sup> and Vincent Ladmira<sup>a\*</sup>

a ICGM, Univ Montpellier, CNRS, ENSCM, Montpellier, France

b CIRIMAT, Université Toulouse 3 – Paul Sabatier, Physique des Polymères, 118 Route de Narbonne, 31062 Toulouse, France

\*Corresponding author: Vincent Ladmira, email: [vincent.ladmira@enscm.fr](mailto:vincent.ladmira@enscm.fr)

### A. Kinetic model equations of the reactional system

The reactional system can be described as follows:

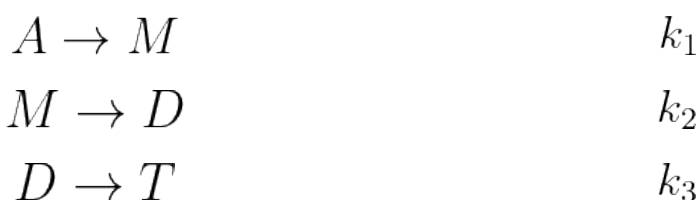

where A is the acid  $\text{H}_3\text{PO}_4$ , M the monosubstituted  $\text{RH}_2\text{PO}_4$ , D the disubstituted  $\text{R}_2\text{HPO}_4$  and T the trisubstituted  $\text{R}_3\text{PO}_4$ ;  $k_1$ ,  $k_2$  and  $k_3$  are  $k_{\text{obs}}$  in the case of a pseudo-first order reaction. The kinetics equations of this systems can be written as follows (Equations S1 to S4):

$$\frac{dA}{dt} = -k_1 \cdot A \quad (\text{S1})$$

$$\frac{dM}{dt} = k_1 \cdot A - k_2 \cdot M \quad (\text{S2})$$

$$\frac{dD}{dt} = k_2 \cdot M - k_3 \cdot D \quad (\text{S3})$$

$$\frac{dT}{dt} = k_3 \cdot D \quad (\text{S4})$$

Solving the system of differential equations leads to the following solutions (Equations S5 to S8):

$$A = A_0 \cdot \exp^{-k_1 \cdot t} \quad (\text{S5})$$

$$M = \frac{A_0 \cdot k_1}{k_2 - k_1} \cdot (\exp^{-k_1 \cdot t} - \exp^{-k_2 \cdot t}) \quad (\text{S6})$$

$$D = \frac{A_0 \cdot k_1 \cdot k_2}{k_2 - k_1} \cdot \left( \frac{\exp^{-k_1 \cdot t}}{k_3 - k_1} - \frac{\exp^{-k_2 \cdot t}}{k_3 - k_2} \right) + \frac{A_0 \cdot k_1 \cdot k_2}{k_3 - k_1} \cdot \exp^{-k_3 \cdot t} \quad (\text{S7})$$

$$T = 1 + \frac{A_0}{(k_1 - k_2)(k_1 - k_3)(k_2 - k_3)} \cdot [(k_3 - k_2)[(k_3 - k_1)(1 - k_1 - k_2) + k_1 \cdot k_2] \cdot \exp^{-k_1 \cdot t} + k_1(k_3 - k_1)(k_2 - k_3 - 1) \cdot \exp^{-k_2 \cdot t} + k_1 \cdot k_2(k_2 - k_1) \cdot \exp^{-k_3 \cdot t}] \quad (\text{S8})$$

### B. General experimental procedure for the determination of epoxy equivalent weights (EEW) by $^1\text{H}$ NMR

50 to 70 mg of benzophenone and 50 to 130 mg of epoxy were dissolved in deuterated acetone. <sup>1</sup>H NMR spectra were integrated in the 7.87-7.28 ppm range for benzophenone protons (10 H), and in the range of CH oxirane peaks and CH<sub>2</sub> oxirane peaks. EEW for each epoxy resin was calculated as follows :

$$EEW_{CH} = \frac{m_{epoxy} \times \int_{7.28}^{7.87} \text{benzophenone} \times M_{\text{benzophenone}}}{10 \times m_{\text{benzophenone}} \times \int \text{CH oxirane}}$$

$$EEW_{CH_2} = \frac{2 \times m_{epoxy} \times \int_{7.28}^{7.87} \text{benzophenone} \times M_{\text{benzophenone}}}{10 \times m_{\text{benzophenone}} \times \int \text{CH}_2 \text{ oxirane}}$$

| Material | m epoxy (g) | m phosphoric acid (g) <sup>a</sup> | m citric acid (g) | m acetone (g) |
|----------|-------------|------------------------------------|-------------------|---------------|
| DGEVAPE  | 40.0        | 4.86                               | -                 | 8.0           |
| ELOPE    | 40.0        | 6.84                               | -                 | 20.0          |
| CEPE     | 40.0        | 2.92                               | -                 | -             |
| DGEVACE  | 40.0        | -                                  | 9.51              | -             |
| ELOCE    | 40.0        | -                                  | 13.40             | -             |
| CECE     | 40.0        | -                                  | 5.71              | -             |

Table S1. Compositions of phosphate ester vitrimers and carboxylate ester reference materials

<sup>a</sup> mass of 85 % phosphoric acid solution (d = 1.685)

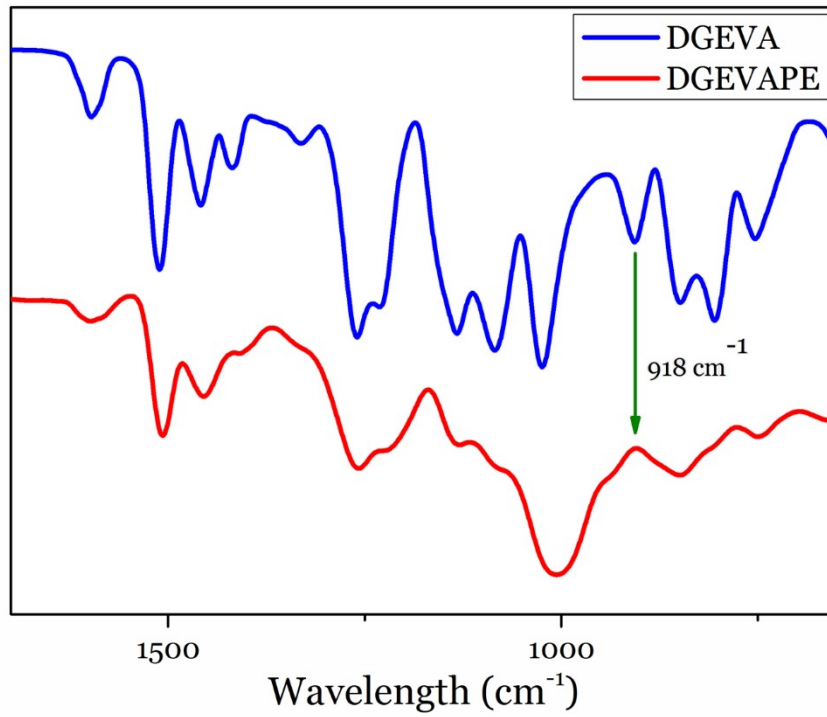

Figure S1. FTIR spectra of DGEVA (epoxy resin) and DGEVAPE (vitramer)

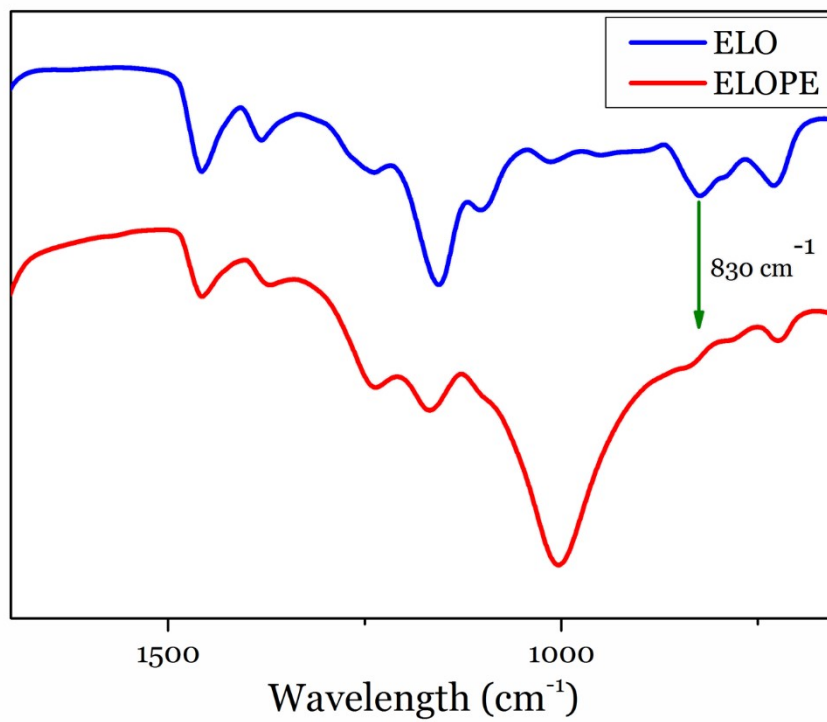

Figure S2. FTIR spectra of ELO (epoxy resin) and ELOPE (vitramer)

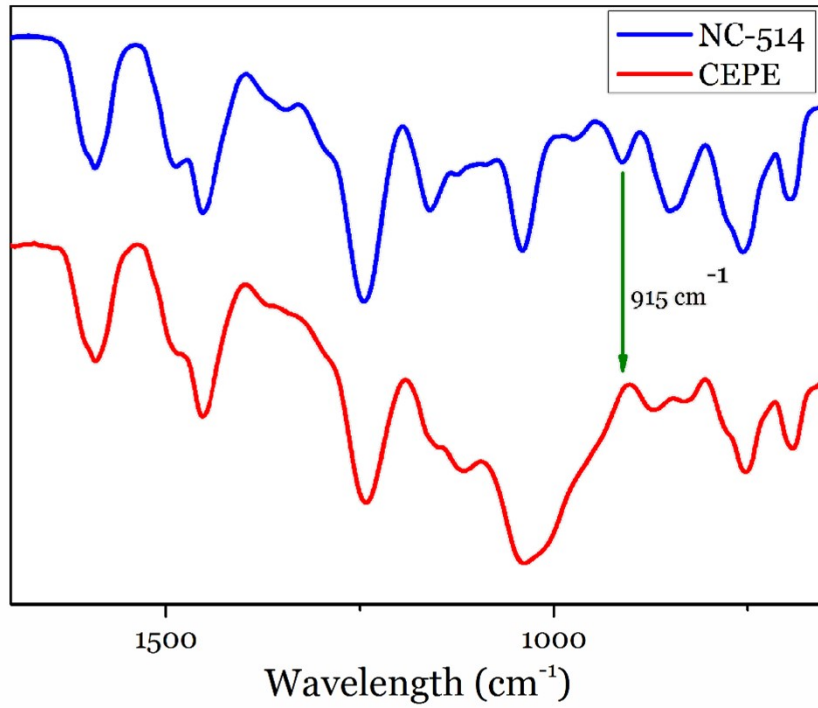

Figure S3. FTIR spectra of NC-514 (epoxy resin) and CEPE (vitrimers)

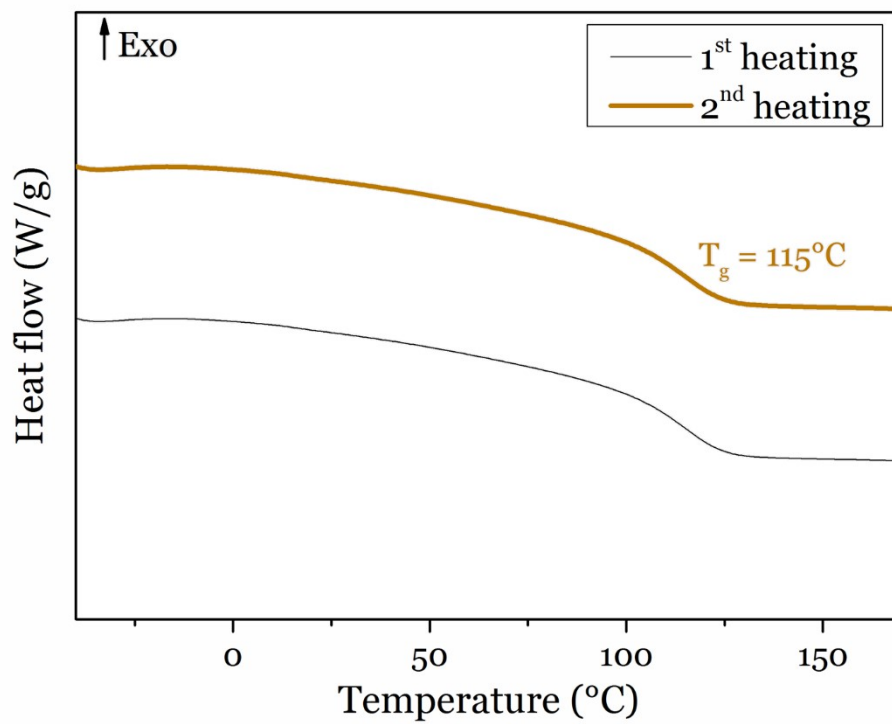

Figure S4. DSC thermograms of DGEVAPE

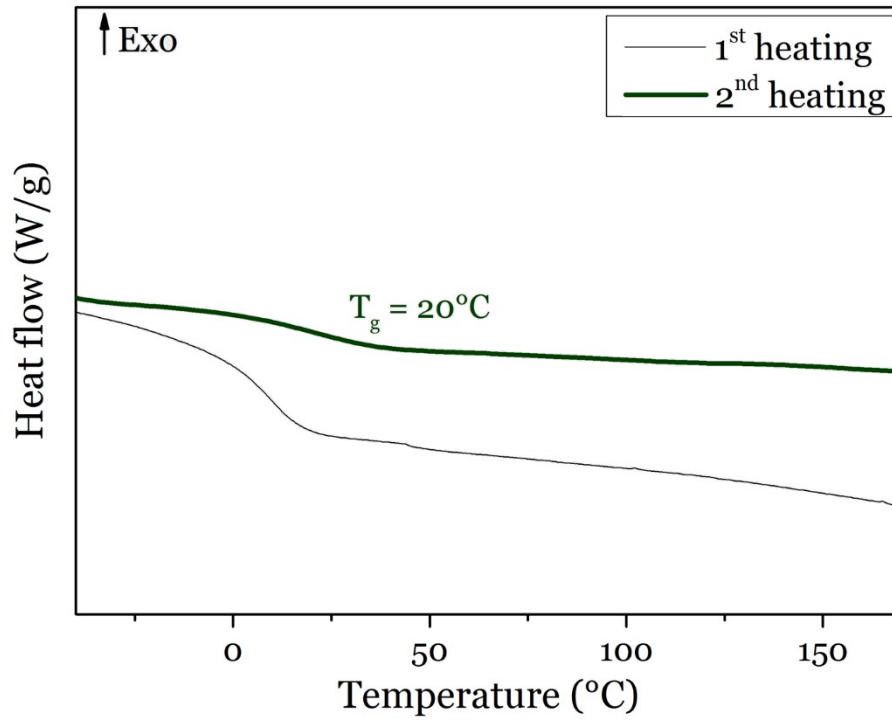

Figure S5. DSC thermograms of ELOPE

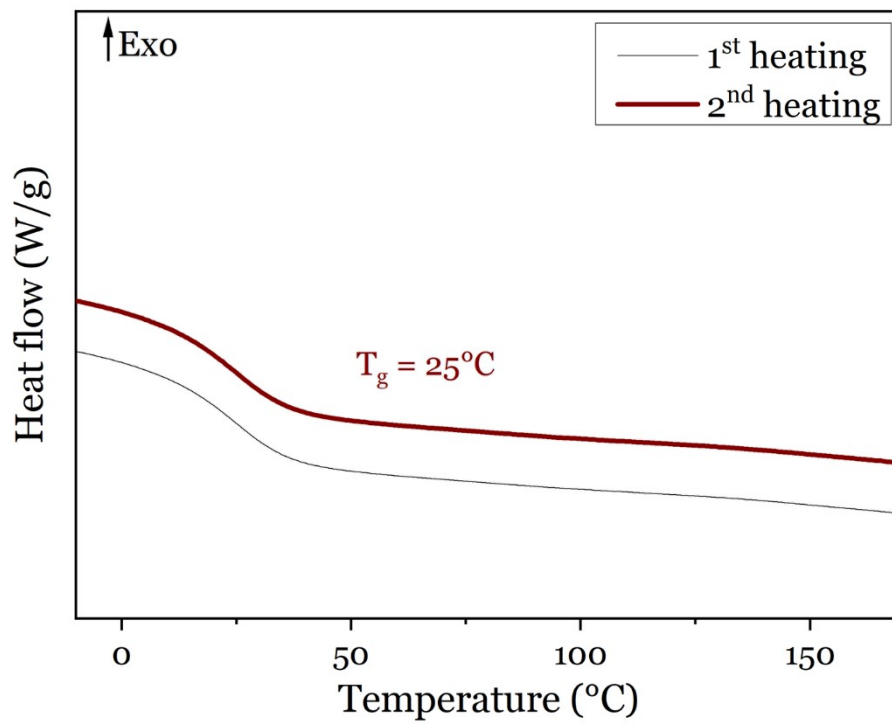

Figure S6. DSC thermograms of CEPE

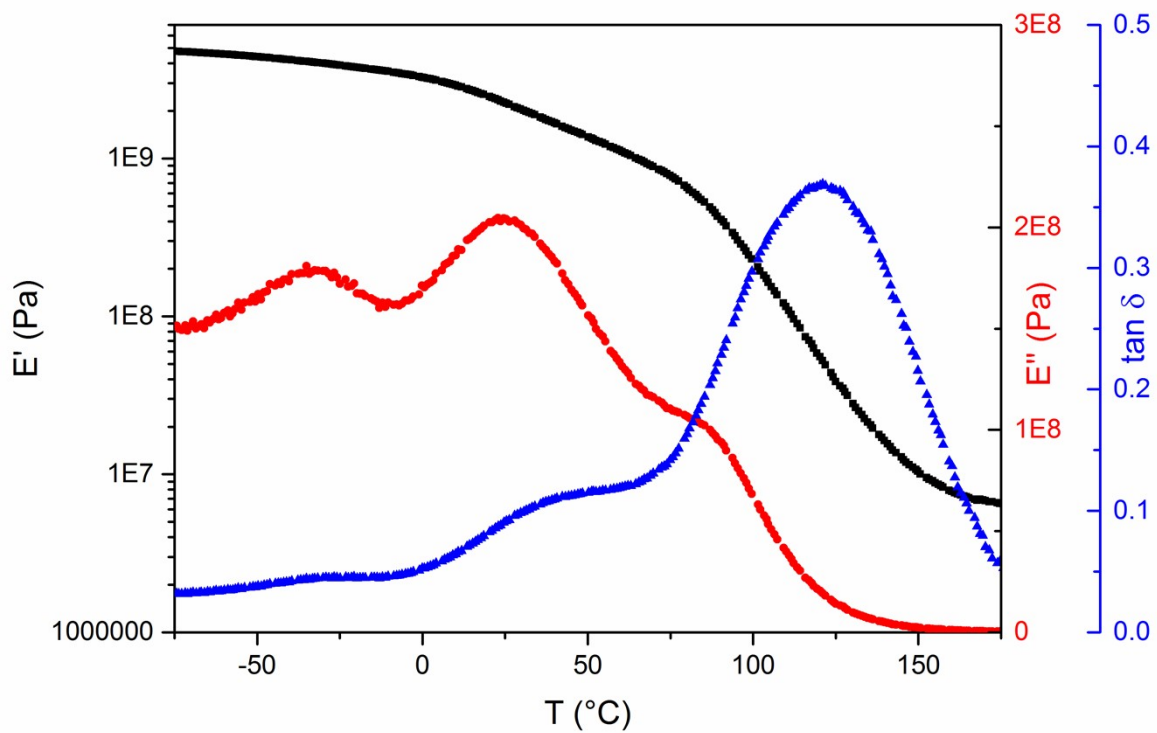

Figure S7. DMA thermograms of DGEVAPE (1 Hz, 3 °C/min)

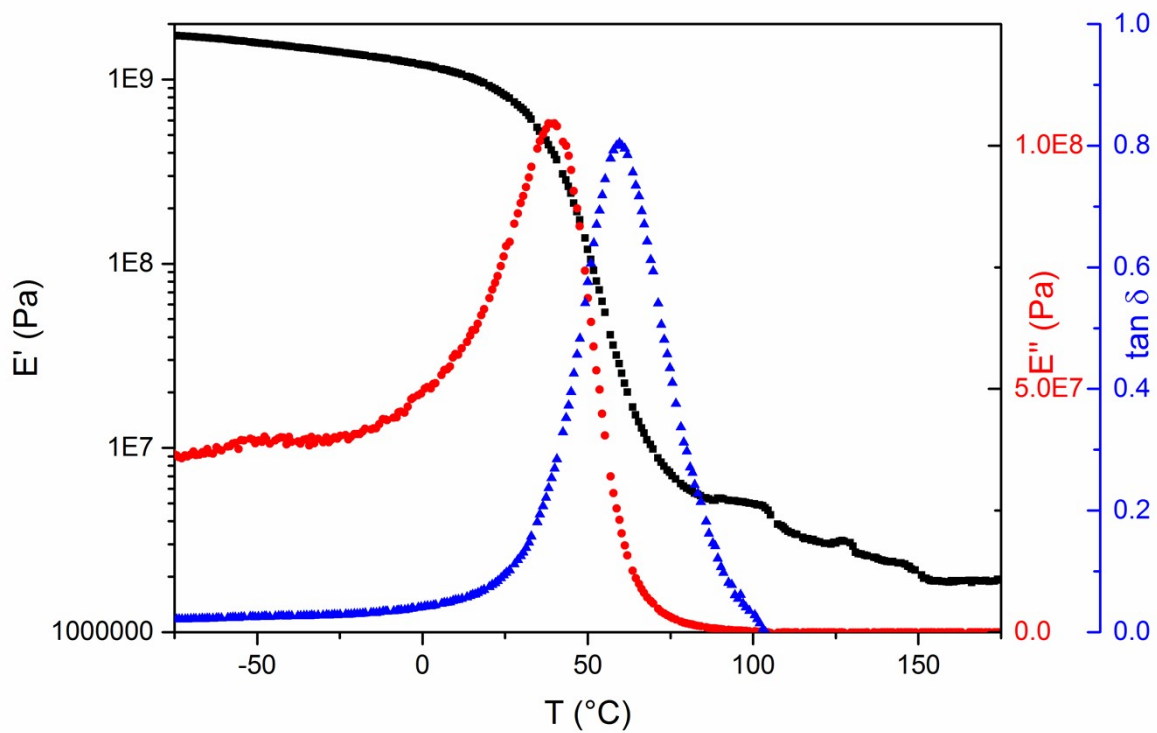

Figure S8. DMA thermograms of ELOPE (1 Hz, 3 °C/min)

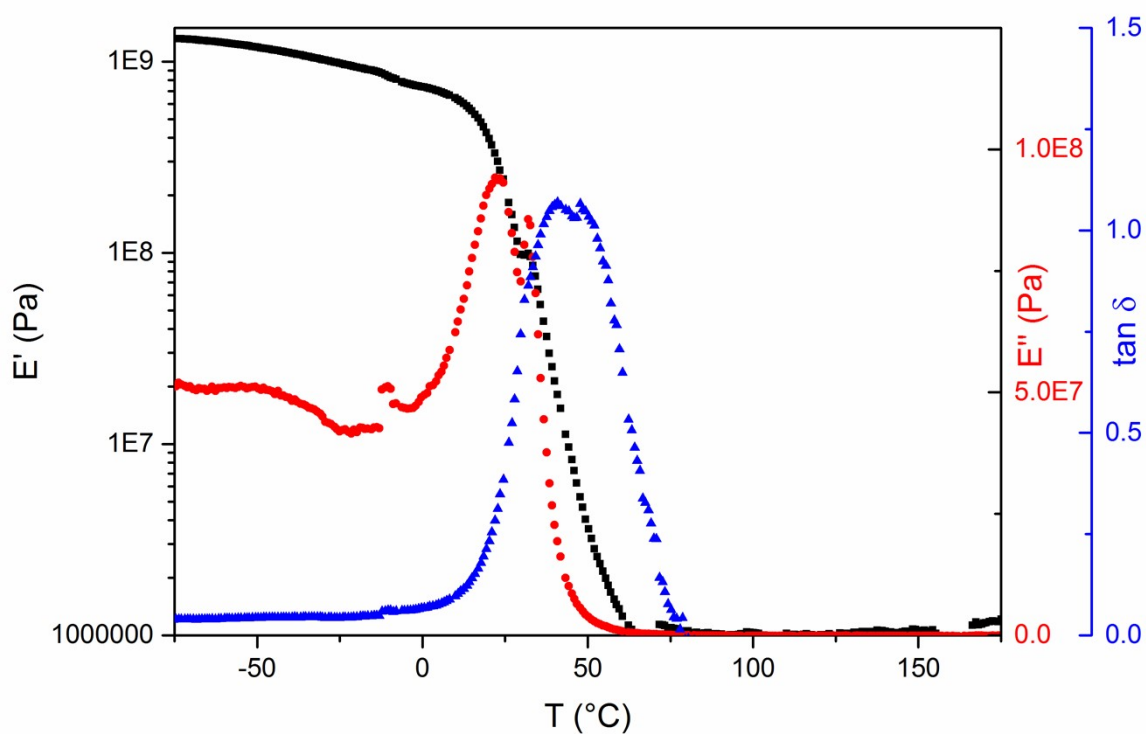

Figure S9. DMA thermograms of CEPE (1 Hz, 3 °C/min)

Table S2. Relaxation times  $\tau_{KWW}$  obtained by fitting the experimental data with the KWW equation and  $R^2$  of the linear fits obtained in an Arrhenius diagram

|                |                                 |      |      |     |     |     |     |
|----------------|---------------------------------|------|------|-----|-----|-----|-----|
| <b>DGEVAPE</b> | <b><math>R^2 = 0.963</math></b> |      |      |     |     |     |     |
| T (°C)         | 130                             | 140  | 150  | 160 | 170 |     |     |
| $\tau$ (s)     | 894                             | 616  | 242  | 149 | 66  |     |     |
| <b>ELOPE</b>   | <b><math>R^2 = 0.985</math></b> |      |      |     |     |     |     |
| T (°C)         | 100                             | 110  | 120  | 130 | 140 | 150 | 160 |
| $\tau$ (s)     | 1150                            | 826  | 476  | 242 | 157 | 84  | 72  |
| <b>CEPE</b>    | <b><math>R^2 = 0.994</math></b> |      |      |     |     |     |     |
| T (°C)         | 90                              | 100  | 110  | 120 | 130 |     |     |
| $\tau$ (s)     | 7337                            | 2460 | 1036 | 455 | 238 |     |     |

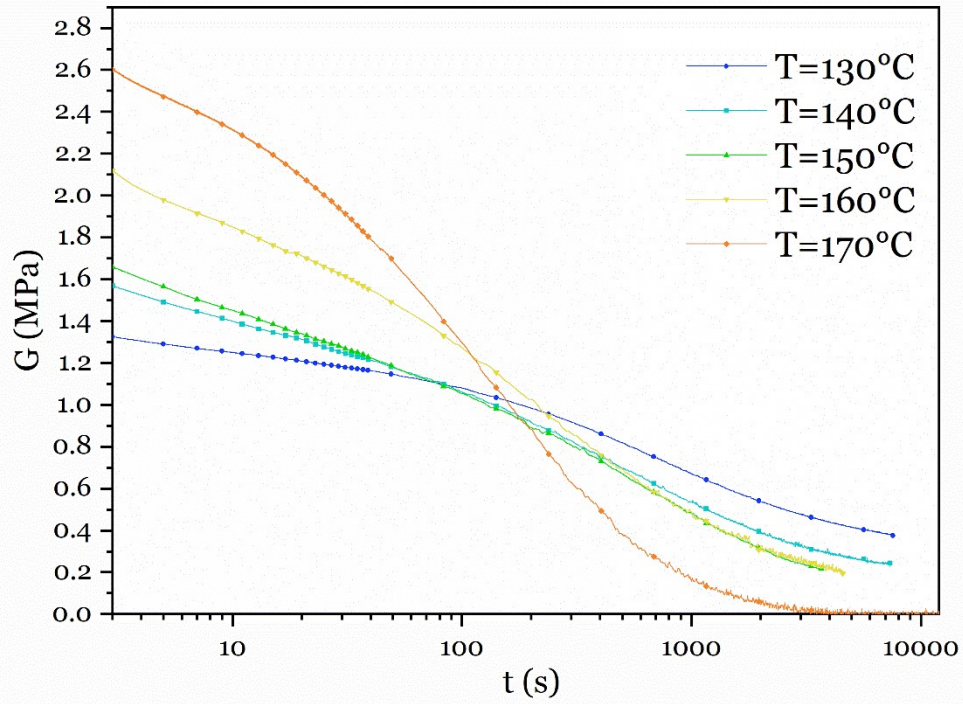

Figure S10. Non-normalized relaxation curves of DGEVAPE

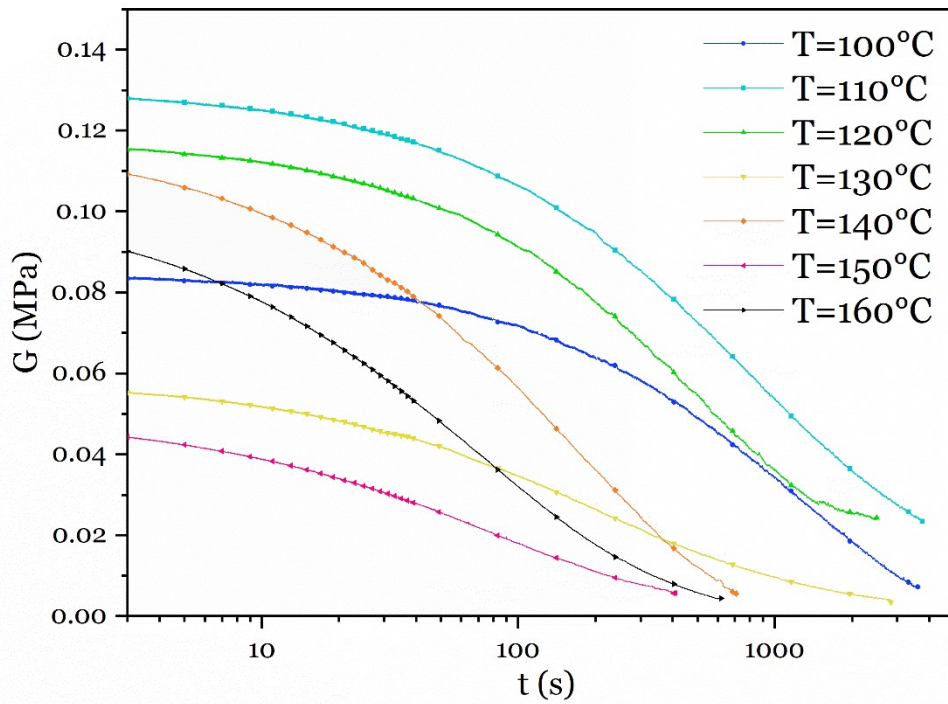

Figure S11. Non-normalized relaxation curves of ELOPE



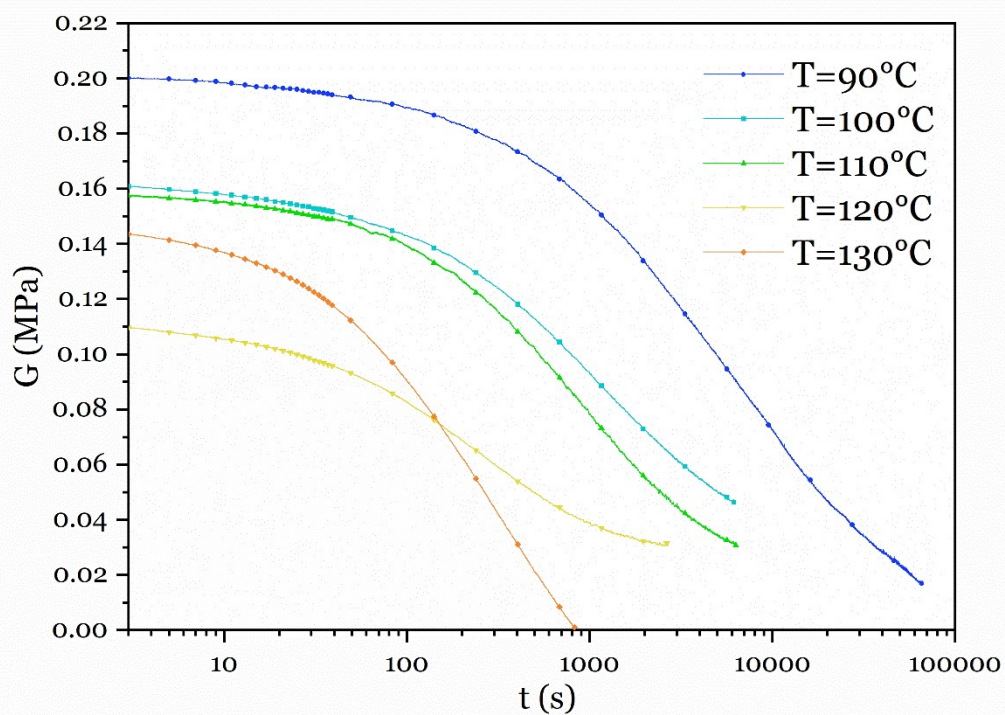

Figure S12. Non-normalized relaxation curves of CEPE

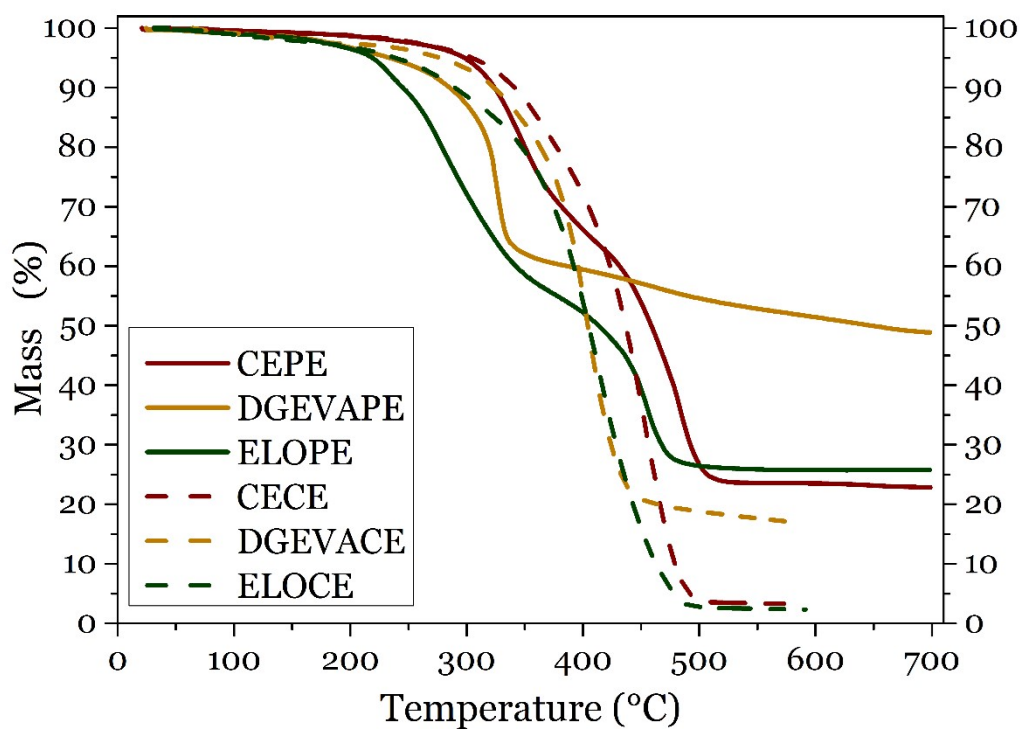

Figure S13. TGA thermograms under nitrogen of the phosphate ester vitrimers DGEVAPE, ELOPE and CEPE and the carboxylic ester counterparts DGEVACE, ELOCE and CECE.

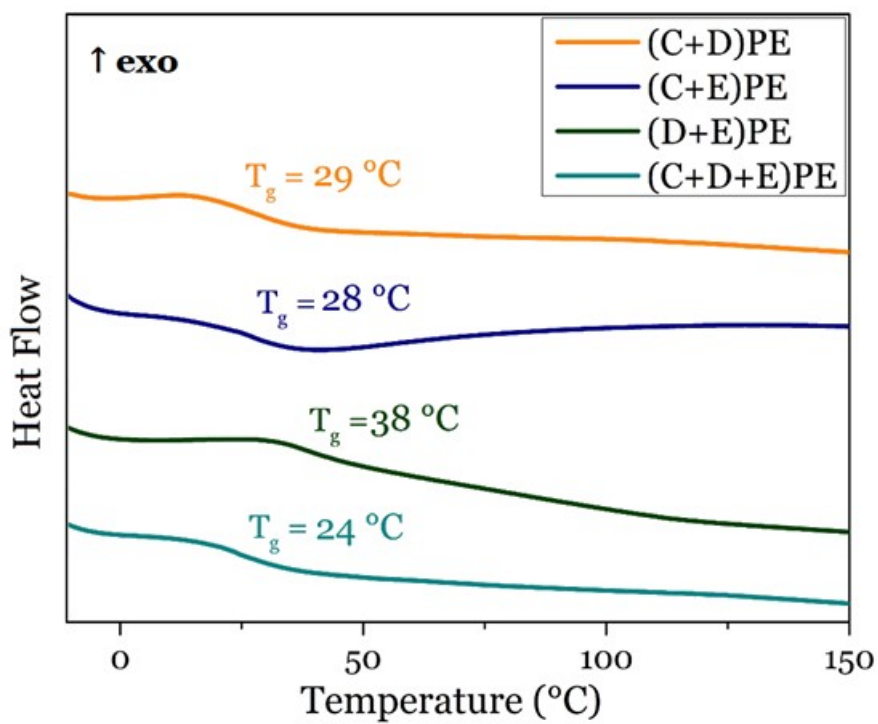

Figure S14. DSC thermograms of vitrimers from epoxy mixtures

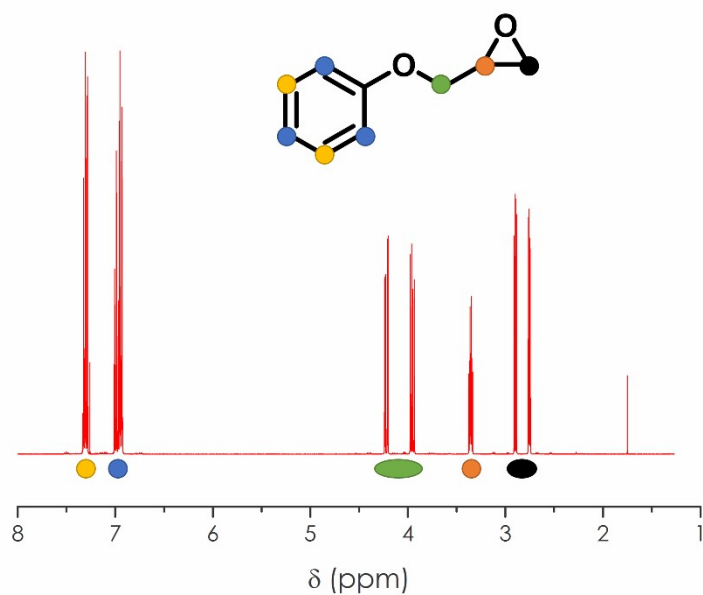

Figure S15.  $^1\text{H}$  NMR spectrum of phenylglycidyl ether

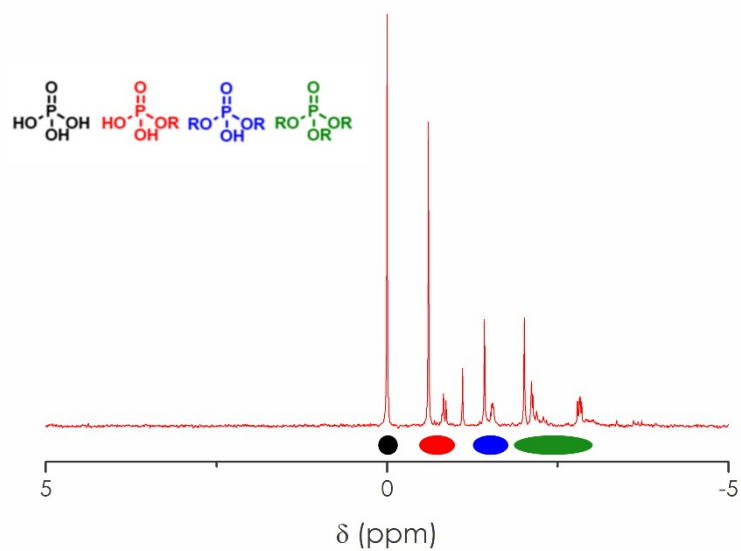

Figure S16.  $^{31}\text{P}$  NMR spectrum of the reaction between phosphoric acid  $\text{H}_3\text{PO}_4$  and phenylglycidyl ether after 2 hours. Phosphoric acid and mono-, di- and tri-substituted esters peaks are visible.

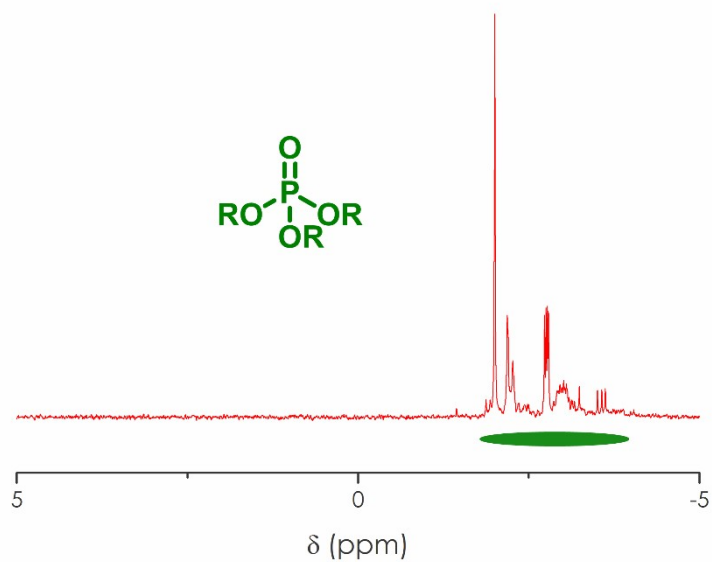

Figure S17.  $^{31}\text{P}$  NMR spectrum of trisubstituted esters of phosphoric acid  $\text{R}_3\text{PO}_4$ . The different peaks are likely due to the mixture of different regioisomers, due to the epoxy opening on the  $-\text{CH}-$  or  $-\text{CH}_2-$  for each successive substitution.
